# Supplementary material
Source: PubMed Central journal article supplement (PMC4136093)
Supplement: AEM.00712-14_zam999105625so1.pdf [file AEM.00712-14_zam999105625so1.pdf]

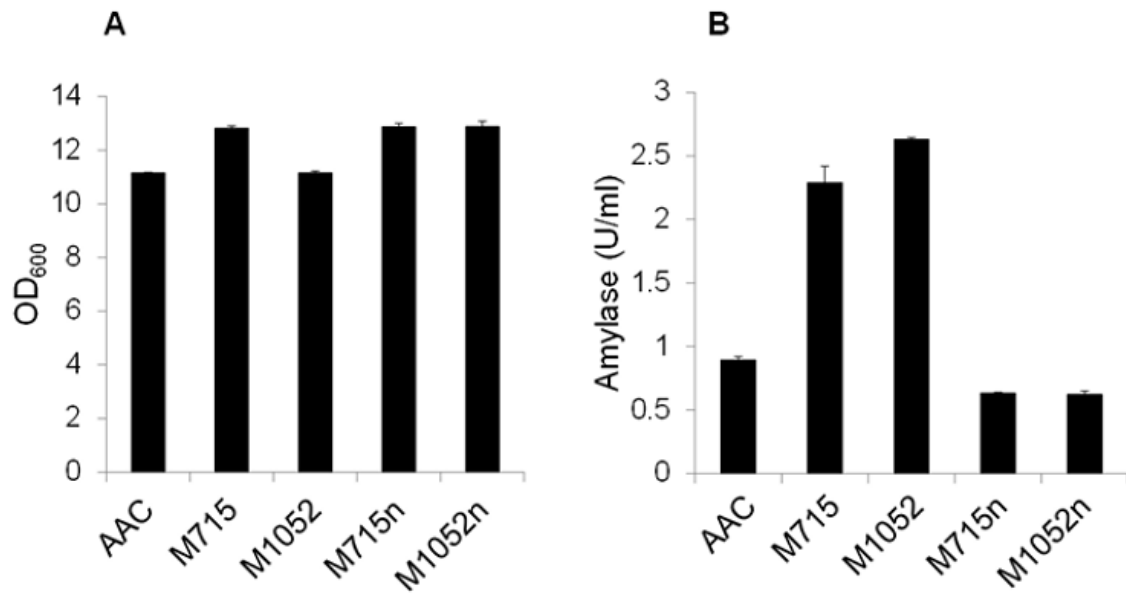

**Figure S1.** Effects of the plasmids extracted from the mutation strains on cell growth (A) and amylase production (B).

**A**

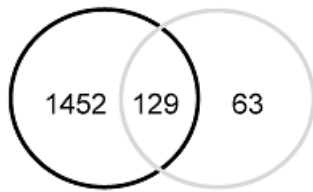

■ M1052-AAC ■ M715-AAC

**B**

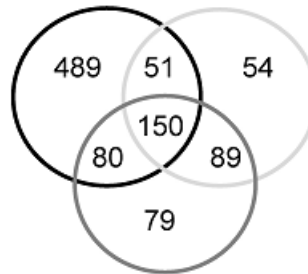

■ M1052-NC ■ M715-NC ■ AAC-NC

**Figure S2.** Venn diagrams showing significantly changed genes in the transcriptome experiment between different strains. FDR < 0.05.

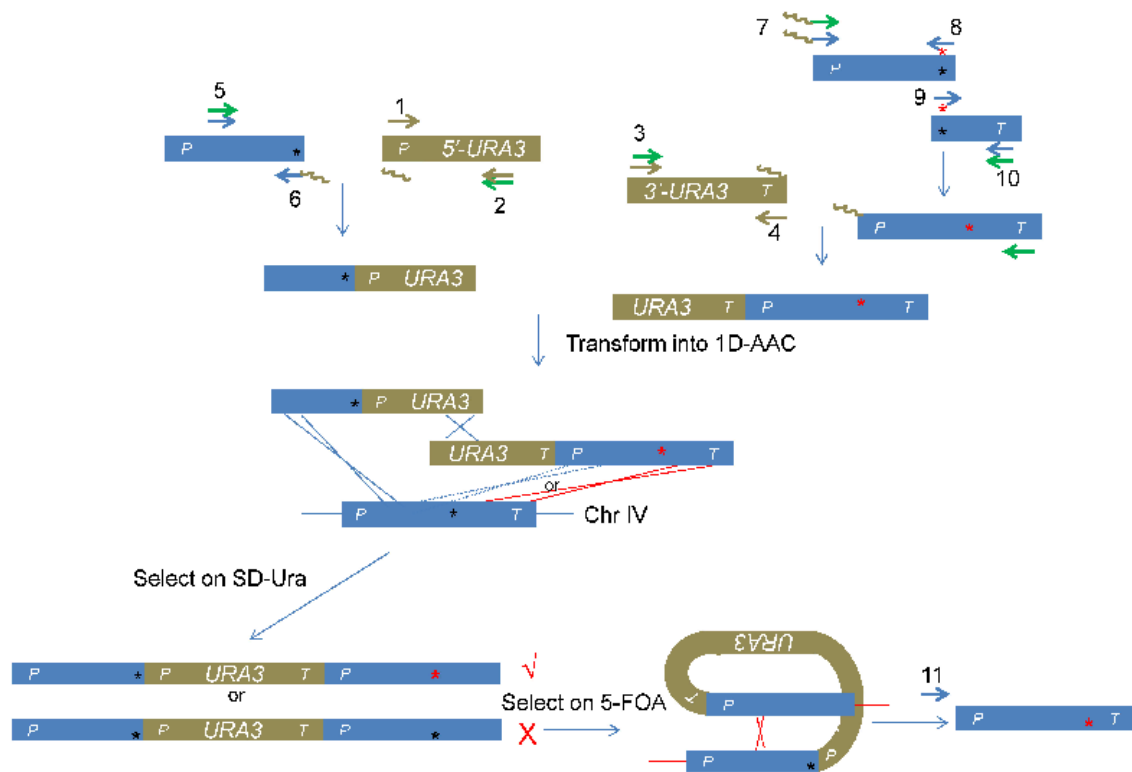

**Figure S3.** Procedure for Site-Directed Point Mutation. Blue bars represent fragments on the interested genes. Grey bars represent gene fragments on the *URA3* gene in *Kluyveromyces lactics*. Star marks the nucleotide to be changed (black) and will be changed to (red). Arrows represent primers used for amplification of the fragments. Primers are listed in Table S2.

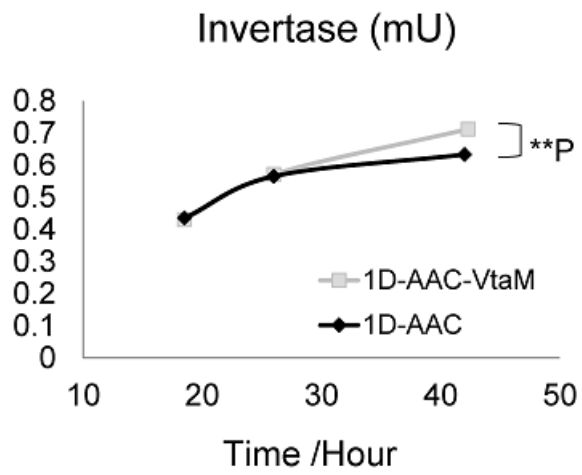

**Figure S4.** Effect of *Vta1S196I* mutation on periplasmic invertase production in shake flask fermentation.

Table S1. Overall statistics of the whole-genome Illumina sequencing

|                         | M715     | M1052    | WT       |
|-------------------------|----------|----------|----------|
| Total reads             | 53846120 | 27382708 | 18413972 |
| Coverage                | 443x     | 225x     | 151x     |
| Reads mapping to genome | 42388376 | 22603996 | 16067934 |
| Mapped reads (%)        | 79%      | 83%      | 87%      |

Table S2. Primers used for amplification of fragments to apply point mutation.

| No. | Primer                                                         |
|-----|----------------------------------------------------------------|
| 1   | KURA_1_f: TTCGGCTTCATGGCAATTCC                                 |
| 2   | KURA_1_r: GAGCAATGAACCCAATAACGAAATC                            |
| 3   | KURA_r_f: tcttgacgttcgctcactgat                                |
| 4   | KURA_r_r: CGTGTCCACCATGAACGACAAT                               |
| 5   | VTA_1_ff: gtgaaattggtccagcgac<br>VTA1_1_r:                     |
| 6   | ACGATCCCCGGAATTGCCATGAAGCCGAATCGATTGTCTGGTGATCAACATC           |
| 7   | VTA1_m_f: tgcttaagaattgctgttcattggtgacacgctatcgggggttggtctcgtt |
| 8   | VTA1_m_r: TCGATTGTCTGGTGATCAACATC                              |
| 9   | VTA1_r_f: gatgttgatcaccagacaatcga                              |
| 10  | VTA1_r_r: CTGCCTTCAACCTCCCATGT                                 |
| 11  | VTA_seq_2: ctattgcttagttcatattgat                              |

Supplementary Text S1. Delft medium (defined minimal medium) for shake flask cultivation:

7.5 g/L  $(\text{NH}_4)_2\text{SO}_4$ ; 14.4 g/L  $\text{KH}_2\text{PO}_4$ ; 0.5 g/L;  $\text{MgSO}_4 \cdot 7\text{H}_2\text{O}$ ; 2 ml/L trace metal solution (per liter, pH 4.0: EDTA (sodium salt), 15.0 g;  $\text{ZnSO}_4 \cdot 7\text{H}_2\text{O}$ , 0.45 g;  $\text{MnCl}_2 \cdot 2\text{H}_2\text{O}$ , 1 g;  $\text{CoCl}_2 \cdot 6\text{H}_2\text{O}$ , 0.3 g;  $\text{CuSO}_4 \cdot 5\text{H}_2\text{O}$ , 0.3 g;  $\text{Na}_2\text{MoO}_4 \cdot 2\text{H}_2\text{O}$ , 0.4 g;  $\text{CaCl}_2 \cdot 2\text{H}_2\text{O}$ , 0.45 g;  $\text{FeSO}_4 \cdot 7\text{H}_2\text{O}$ , 0.3 g;  $\text{H}_3\text{BO}_3$ , 0.1 g and KI, 0.10 g). The pH of minimal medium was adjusted to 5.0 by adding 2 M NaOH and autoclaved.

Autoclaved glucose was added at a concentration of 20 g/L.

1ml/L of Vitamin solution (per liter, pH 6.5: biotin, 0.05 g; p-amino benzoic acid, 0.2 g; nicotinic acid, 1 g; Ca-pantothenate, 1 g; pyridoxine-HCl, 1 g; thiamine-HCl, 1 g and myo-inositol, 25 g) was filter sterilized and aseptically added to the medium after autoclaving.
